# Supplementary material for: ATHB4 and HAT3, two class II HD-ZIP transcription factors, control leaf development in Arabidopsis
Source: PubMed Central journal article supplement — Plant Signal Behav. 2012 Nov 1;7(11):1382–7. doi: 10.4161/psb.21824 (PMC3548853; doi:10.4161/psb.21824), 2012-11-01
Supplement: psb-7-1382-s01.pdf [file psb-7-1382-s01.pdf]

**Supplemental videos. Mutations in HD-ZIPII genes cause polarity defects in cotyledons.** 3D-reconstruction videos using the Osirix software from image sections of wild-type (A) and *athb4 hat3* (B) cotyledons. Images were taken from 1-day-old seedlings, and correspond to the same seedlings of figure 3 (I, J). Mutant seedlings lack mostly palisade cells and some vascular tissue, suggesting they are missing adaxial identity.
